# Supplementary material for: Differential effects of excess high-fructose corn syrup on the DNA methylation of hippocampal neurotrophic factor in childhood and adolescence
Source: PubMed Central journal article supplement (PMC9205497; doi:10.1371/journal.pone.0270144), 2022-06-17
Supplement: pone.0270144.s001.pdf [file pone.0270144.s001.pdf]

Period I

| Group   | Ct value (Left: Housekeeping Gene, Right: Target Gene) |         |       |       |       |       |       |       |
|---------|--------------------------------------------------------|---------|-------|-------|-------|-------|-------|-------|
|         | Actb                                                   | Bdnf IV | Actb  | Ngf   | Actb  | Nt3   | Actb  | Nt4   |
| Control | 20.38                                                  | 25.32   | 20.38 | 23.99 | 20.38 | 26.31 | 20.38 | 32.69 |
|         | 20.51                                                  | 26.29   | 20.51 | 24.20 | 20.51 | 26.87 | 20.51 | 32.28 |
|         | 19.60                                                  | 24.43   | 19.60 | 23.11 | 19.60 | 25.65 | 19.60 | 31.63 |
|         | 19.13                                                  | 24.20   | 19.13 | 23.13 | 19.13 | 25.85 | 19.13 | 32.24 |
|         | 19.38                                                  | 24.84   | 19.38 | 23.62 | 19.38 | 25.48 | 19.38 | 33.50 |
| HFCS    | 23.35                                                  | 29.10   | 23.35 | 25.94 | 23.35 | 28.57 | 23.35 | 35.12 |
|         | 21.36                                                  | 27.45   | 21.36 | 25.43 | 21.36 | 27.79 | 21.36 | 33.23 |
|         | 19.72                                                  | 25.44   | 19.72 | 23.47 | 19.72 | 25.12 | 19.72 | 33.75 |
|         | 20.16                                                  | 25.71   | 20.16 | 23.63 | 20.16 | 25.48 | 20.16 | 34.10 |
|         | 19.96                                                  | 25.57   | 19.96 | 23.97 | 19.96 | 26.57 | 19.96 | 30.78 |
|         | 22.58                                                  | 28.55   | 22.58 | 26.15 | 22.58 | 29.00 | 22.58 | 33.75 |

Period II

| Group   | Ct value (Left: Housekeeping Gene, Right: Target Gene) |         |       |       |       |       |       |       |
|---------|--------------------------------------------------------|---------|-------|-------|-------|-------|-------|-------|
|         | Actb                                                   | Bdnf IV | Actb  | Ngf   | Actb  | Nt3   | Actb  | Nt4   |
| Control | 18.76                                                  | 23.60   | 15.83 | 25.63 | 15.83 | 25.05 | 15.83 | 32.37 |
|         | 19.18                                                  | 23.72   | 16.12 | 25.97 | 16.12 | 25.86 | 16.12 | 32.03 |
|         | 19.18                                                  | 23.71   | 16.26 | 26.30 | 16.26 | 26.29 | 16.26 | 32.07 |
|         | 19.22                                                  | 24.09   | 16.67 | 26.64 | 16.67 | 26.28 | 16.67 | 32.46 |
|         | 19.08                                                  | 24.11   | 15.93 | 26.11 | 15.93 | 26.46 | 15.93 | 32.08 |
|         | 18.94                                                  | 24.11   | 15.98 | 25.78 | 15.98 | 25.10 | 15.98 | 32.34 |
|         | 18.94                                                  | 24.31   | 15.92 | 26.08 | 15.92 | 25.06 | 15.92 | 32.33 |
|         | 19.27                                                  | 24.66   | 16.24 | 26.23 | 16.24 | 25.58 | 16.24 | 32.57 |
| HFCS    | 18.72                                                  | 23.94   | 15.80 | 25.96 | 15.80 | 24.85 | 15.80 | 31.89 |
|         | 19.22                                                  | 24.10   | 16.39 | 26.43 | 16.39 | 26.57 | 16.39 | 31.90 |
|         | 19.00                                                  | 23.83   | 15.97 | 25.98 | 15.97 | 25.17 | 15.97 | 31.82 |
|         | 18.71                                                  | 23.51   | 16.04 | 25.86 | 16.04 | 25.47 | 16.04 | 32.23 |
|         | 18.62                                                  | 23.79   | 16.12 | 25.82 | 16.12 | 25.00 | 16.12 | 31.54 |
|         | 18.80                                                  | 24.08   | 16.06 | 25.76 | 16.06 | 25.25 | 16.06 | 32.36 |
| 18.84   | 23.73                                                  | 15.89   | 26.08 | 15.89 | 26.05 | 15.89 | 31.36 |       |

Period III

| Group   | Ct value (Left: Housekeeping Gene, Right: Target Gene) |         |       |       |       |       |       |       |
|---------|--------------------------------------------------------|---------|-------|-------|-------|-------|-------|-------|
|         | Actb                                                   | Bdnf IV | Actb  | Ngf   | Actb  | Nt3   | Actb  | Nt4   |
| Control | 19.50                                                  | 23.81   | 19.50 | 26.36 | 19.50 | 26.51 | 19.50 | 32.46 |
|         | 20.11                                                  | 24.12   | 20.11 | 27.36 | 20.11 | 27.05 | 20.11 | 31.69 |
|         | 19.93                                                  | 23.66   | 19.93 | 26.53 | 19.93 | 25.70 | 19.93 | 31.62 |
|         | 19.38                                                  | 23.10   | 19.38 | 26.31 | 19.38 | 26.27 | 19.38 | 31.89 |
|         | 19.85                                                  | 22.98   | 19.85 | 25.90 | 19.85 | 25.91 | 19.85 | 31.86 |
|         | 19.40                                                  | 22.92   | 19.40 | 25.95 | 19.40 | 25.61 | 19.40 | 31.39 |
|         | 19.25                                                  | 23.10   | 19.25 | 26.14 | 19.25 | 26.40 | 19.25 | 31.49 |
| HFCS    | 19.71                                                  | 22.51   | 19.71 | 25.71 | 19.71 | 25.74 | 19.71 | 30.91 |
|         | 19.42                                                  | 22.53   | 19.42 | 25.82 | 19.42 | 25.78 | 19.42 | 31.86 |
|         | 20.26                                                  | 24.11   | 20.26 | 26.49 | 20.26 | 26.53 | 20.26 | 33.08 |
|         | 19.24                                                  | 23.42   | 19.24 | 26.12 | 19.24 | 25.69 | 19.24 | 32.05 |
|         | 19.37                                                  | 23.30   | 19.37 | 26.02 | 19.37 | 25.71 | 19.37 | 32.36 |
| 19.66   | 22.50                                                  | 19.66   | 25.94 | 19.66 | 26.23 | 19.66 | 30.62 |       |
