# Supplementary material for: Differential effects of excess high-fructose corn syrup on the DNA methylation of hippocampal neurotrophic factor in childhood and adolescence
Source: PubMed Central journal article supplement (PMC9205497; doi:10.1371/journal.pone.0270144), 2022-06-17

# Period I

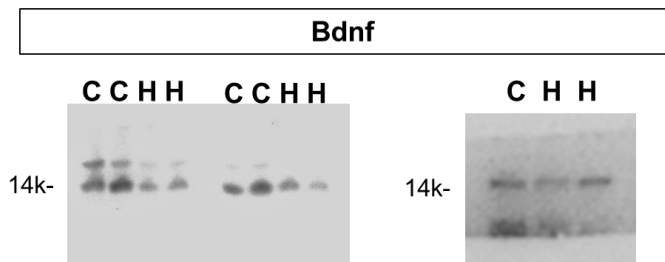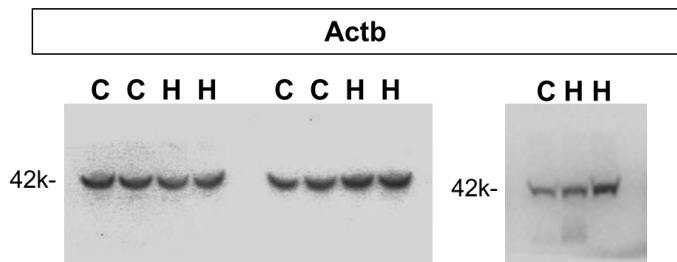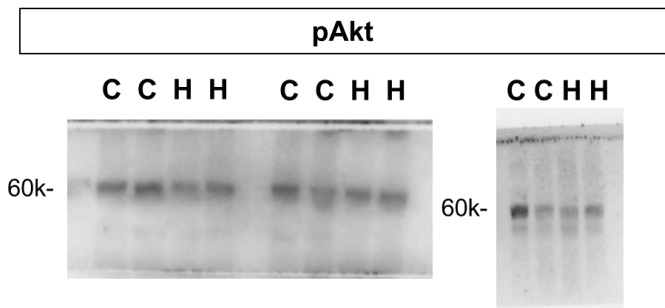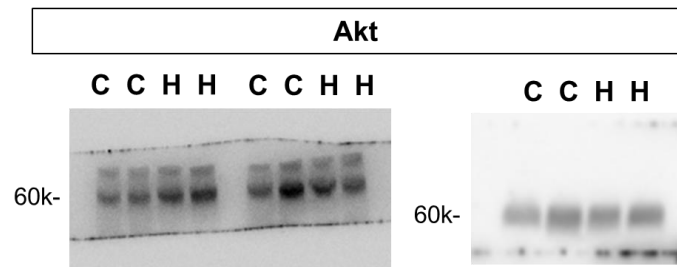

# Period II

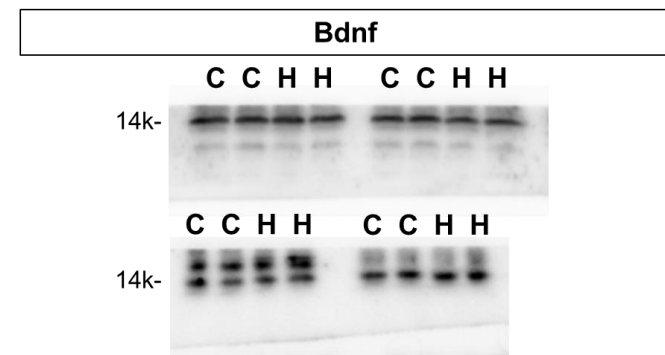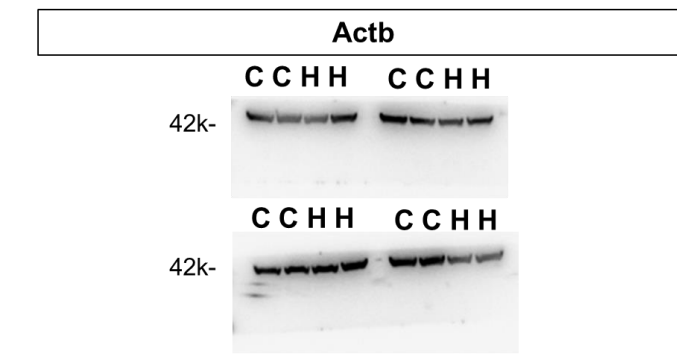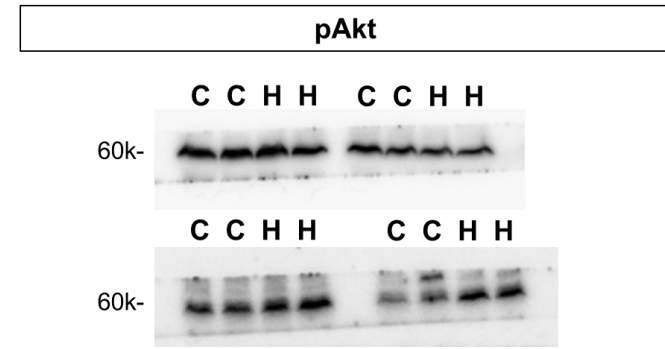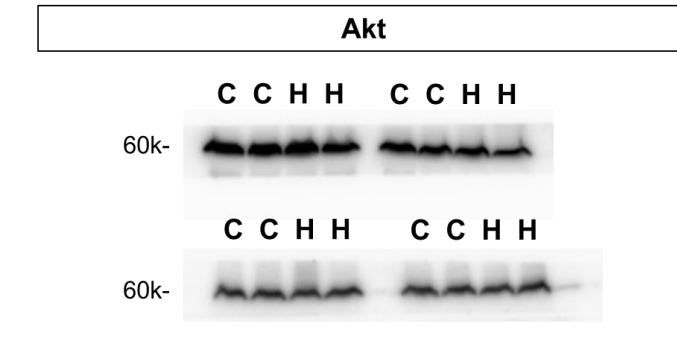

# Period III

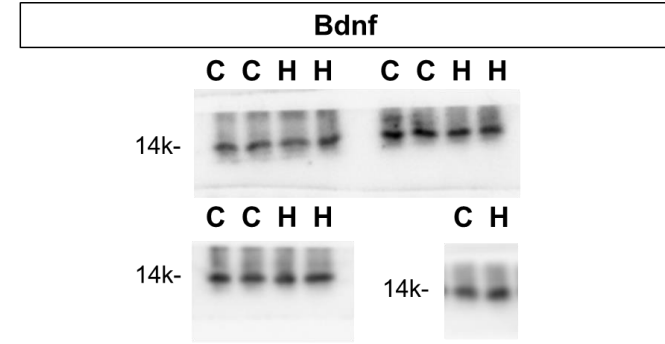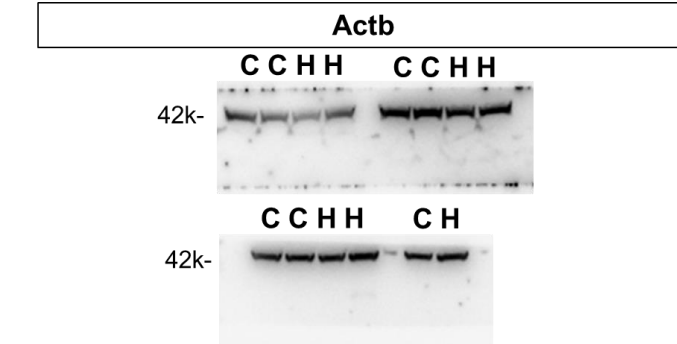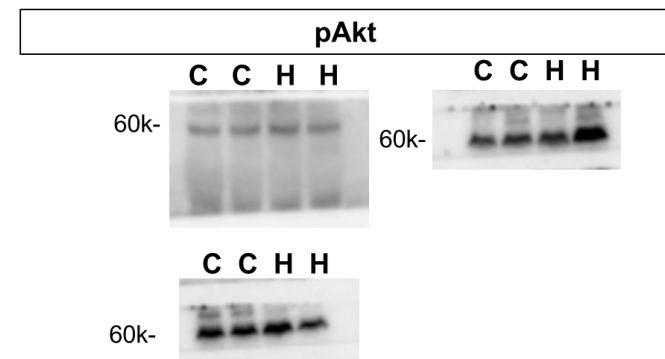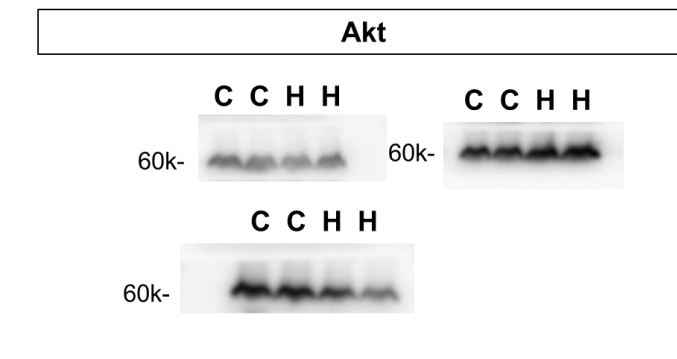

Supplement: pone.0270144.s002.pdf [file pone.0270144.s002.pdf]
